# Supplementary material for: Evidence of a causal and modifiable relationship between kidney function and circulating trimethylamine N-oxide
Source: PubMed Central journal article supplement (PMC10511707; doi:10.1038/s41467-023-39824-4), 2023-09-20
Supplement: 41467_2023_39824_MOESM3_ESM.pdf [file 41467_2023_39824_MOESM3_ESM.pdf]

## **Description of Additional Supplementary Files**

**Supplementary Data 1.** List of all variables used in machine learning models. VariablesIDs refer to variable names as displayed in the Source data with DisplayNames the corresponding features. Variable\_Groups describe in which feature category each variable was assigned to for the analyses of the study.
